# Supplementary material for: In-vivo shift of the microbiota in oral biofilm in response to frequent sucrose consumption
Source: PubMed Central journal article supplement (PMC6155074; doi:10.1038/s41598-018-32544-6), 2018-09-21

## Supplementary Info File

### **In-vivo shift of the microbiota in oral biofilm in response to frequent sucrose consumption**

Annette Carola Anderson<sup>1\*\*</sup>, Michael Rothballer<sup>2+</sup>, Markus Jörg Altenburger<sup>1</sup>, Johan Peter Woelber<sup>1</sup>, Lamprini Karygianni<sup>3</sup>, Ilias Lagkouvardos<sup>4</sup>, Elmar Hellwig<sup>1</sup>, Ali Al-Ahmad<sup>1</sup>

<sup>1</sup>Department of Operative Dentistry and Periodontology, Faculty of Medicine, Albert-Ludwigs-University, Freiburg, Germany

<sup>2</sup>Institute of Network Biology, Helmholtz Zentrum München, German Research Center for Environmental Health, Neuherberg, Germany

<sup>3</sup>Clinic of Preventive Dentistry, Periodontology and Cariology, Center of Dental medicine, University of Zürich, Switzerland

<sup>4</sup>ZIEL - Institute for Food and Health, Core Facility Microbiome/NGS, Technical University of Munich, Freising, Germany

\*ACA and MR contributed equally to this work

Address correspondence to:

Dr. Annette Anderson  
Department of Operative Dentistry and Periodontology,  
Hugstetter Straße 55  
79106 Freiburg  
Germany  
annette.anderson@uniklinik-freiburg.de

**Figure S1: Relative abundances**

Relative abundances (%) of the different phyla found in all samples from the 11 study participants.

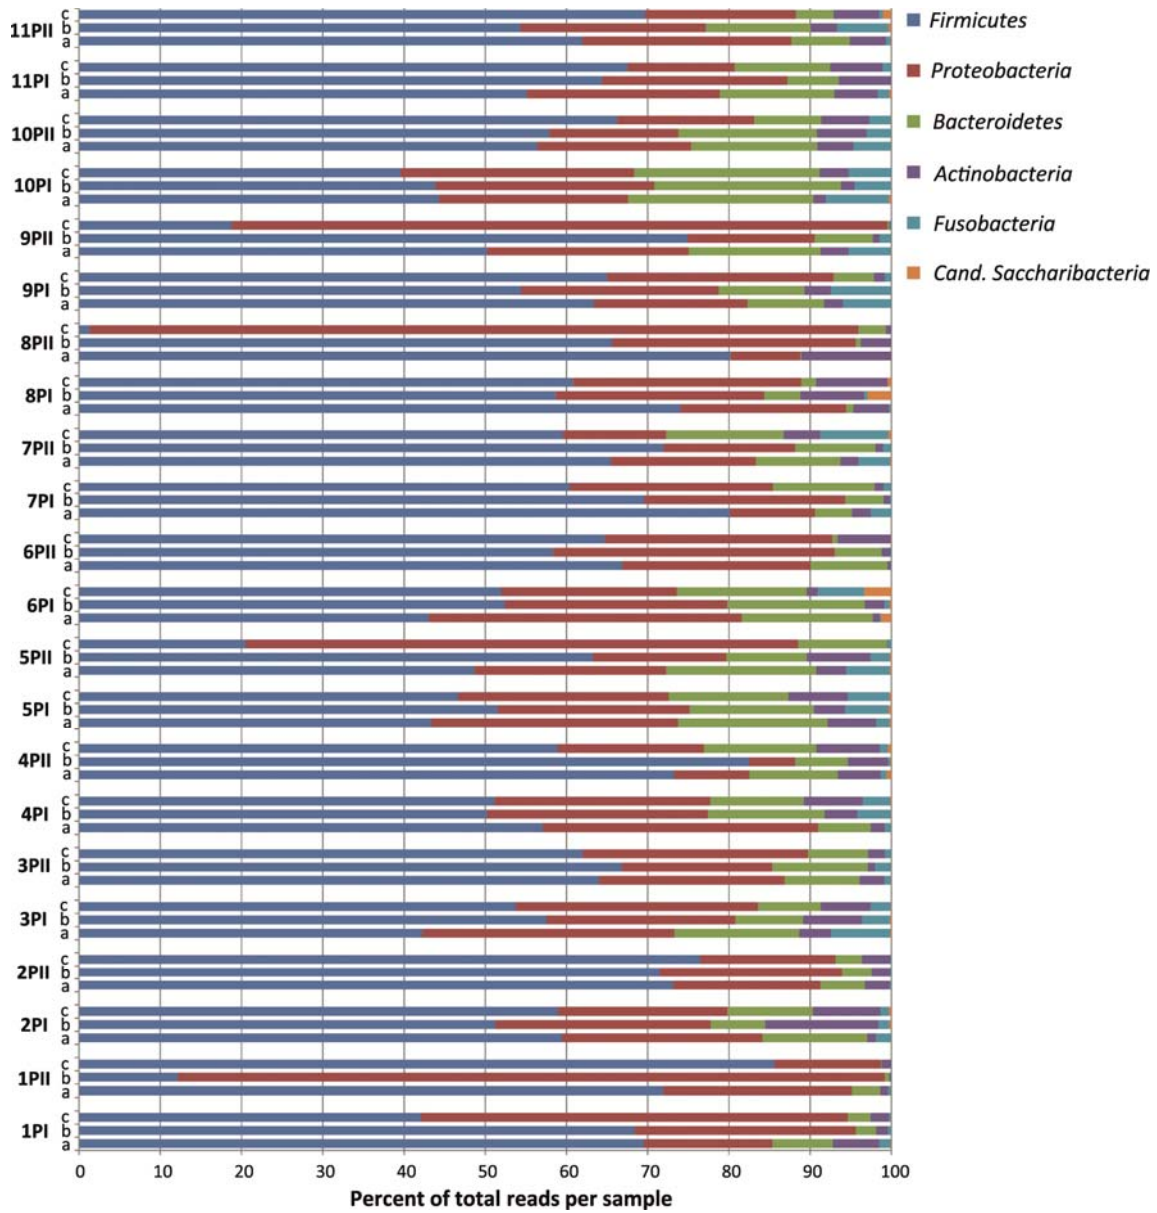



**Figure S5: Abundances of *Streptococcus* spp.**

Relative abundances of the different *Streptococcus* species of all samples from the 11 study participants. *Streptococcus* spp. refers to those OTUs which could not be unambiguously assigned to one of the oral *Streptococcus* species.

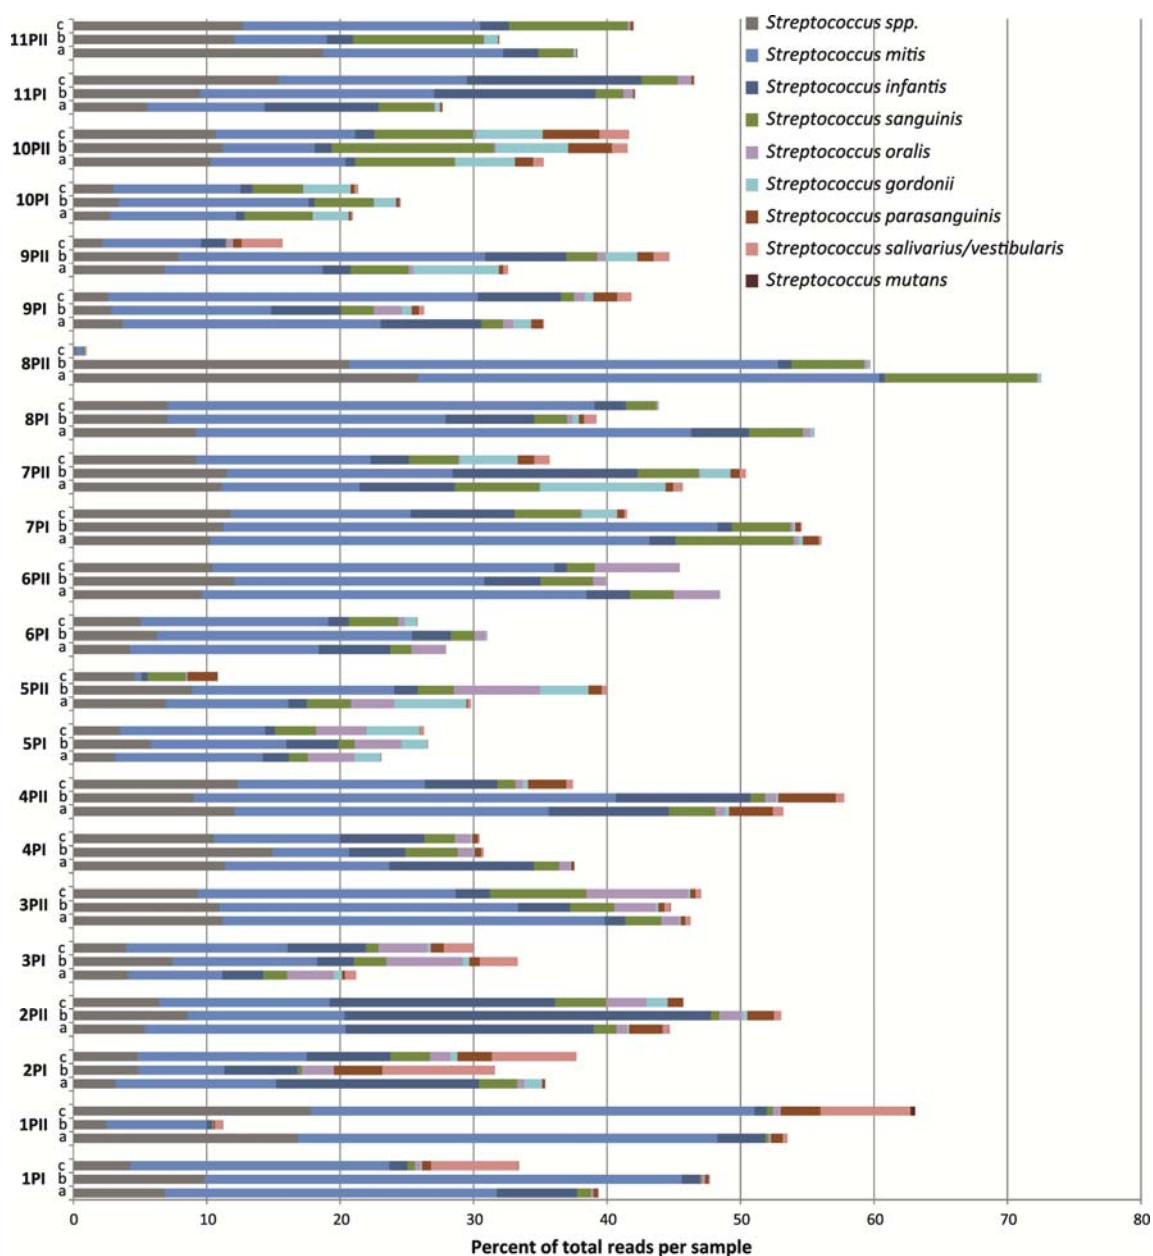

Supplement: 41598_2018_32544_MOESM1_ESM.pdf [file 41598_2018_32544_MOESM1_ESM.pdf]
